# Supplementary material for: Synthesis of surfactant-free Pt concave nanoparticles in a freshly-made or recycled molten salt
Source: Royal Society of Chemistry journal article supplement (doi:10.1039/c2gc35995b), 2012-01-01
Supplement: c2gc35995b.pdf [file c2gc35995b.pdf]

## Synthesis of Surfactant-Free Pt Concave Nanoparticles in a Freshly-made or Recycled Molten Salt

Haidong Zhao,<sup>a,b</sup> Shengchun Yang\*<sup>a</sup>, Hongjun You,<sup>a</sup> Yanfu Wu<sup>a</sup> and Bingjun Ding<sup>a</sup>

<sup>a</sup>State Key Laboratory for Mechanical Behavior of Materials, Ministry of Education Key Laboratory for Non-Equilibrium Synthesis and Modulation of Condensed Matter, School of Science, Xi'an Jiaotong University, Xi'an 710049, Shann Xi, People's Republic of China.

<sup>b</sup>School of Chemistry and Chemical Engineering, Shanxi Datong University, Datong 037009, People's Republic of China

E-mail: ysch1209@mail.xjtu.edu.cn

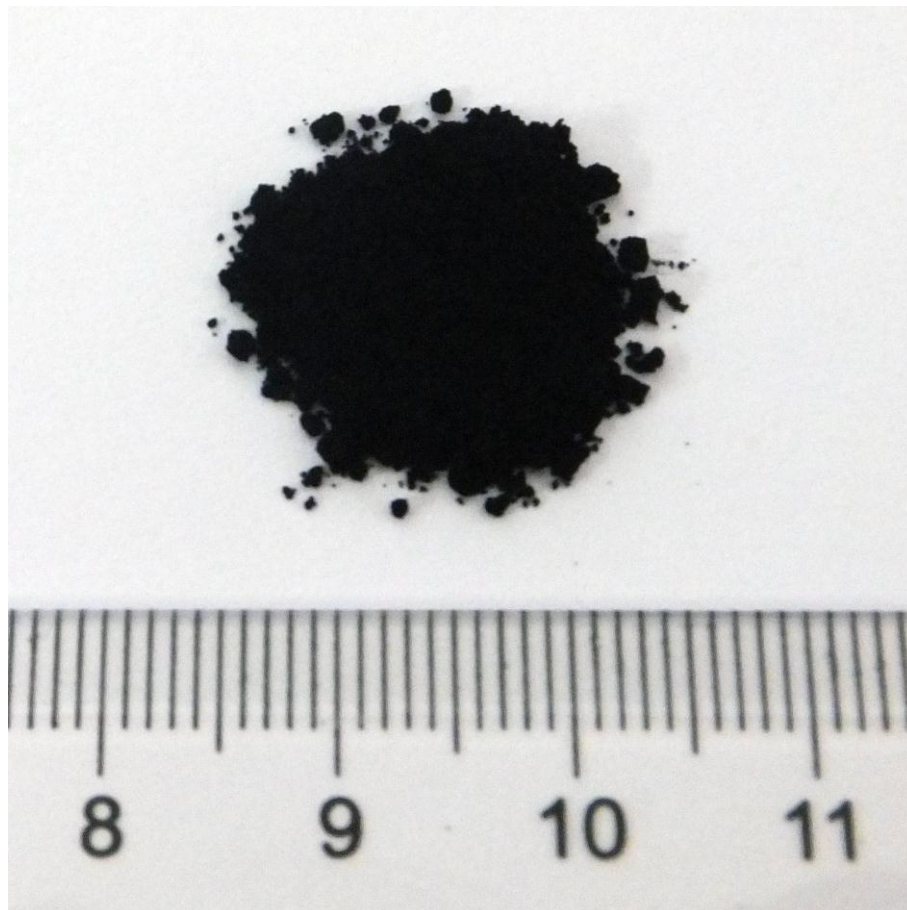

Fig. S1 A digital photo of the Pt concave NPs synthesized with 100 g of the mixture MS of  $\text{KNO}_3$  and  $\text{LiNO}_3$ , 0.352 g  $\text{Pt}(\text{NH}_3)_4\text{C}_2\text{O}_4$  and 0.224 g  $\text{KOH}$  at 180 °C. Finally, about 0.2 g Pt concave NPs was obtained and the yield was higher than 99 %.

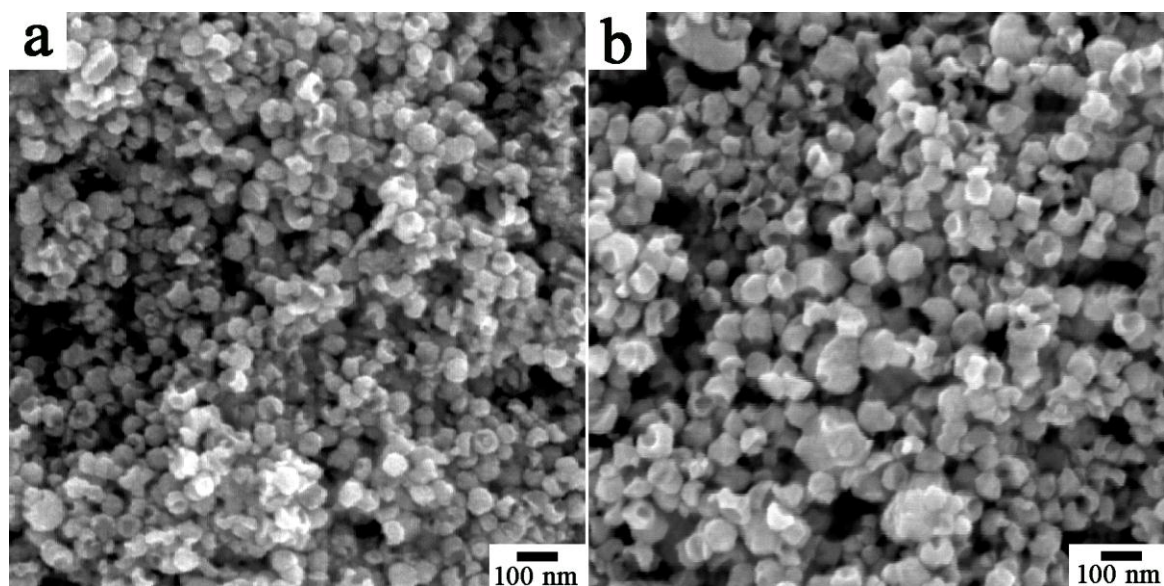

Fig. S2 SEM images of the Pt nanocave synthesized at different reaction temperature. The reaction temperature: (a) 170 °C, and (b) 190 °C, respectively.

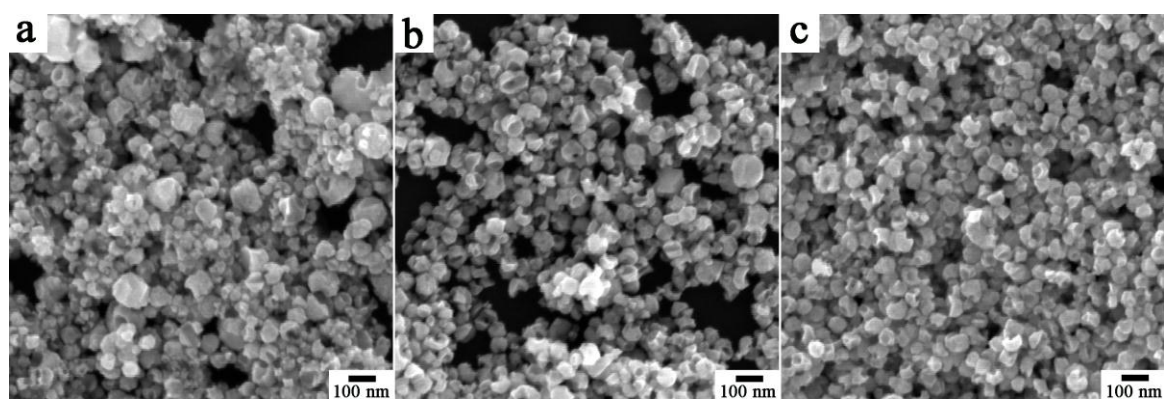

Fig. S3 SEM images of the Pt concave NPs synthesized with different concentration of the Pt(NH<sub>3</sub>)<sub>4</sub>C<sub>2</sub>O<sub>4</sub>. The concentrations of the Pt(NH<sub>3</sub>)<sub>4</sub>C<sub>2</sub>O<sub>4</sub> were 44 mg (a), 88 mg (b), and 0.352 g Pt(NH<sub>3</sub>)<sub>4</sub>C<sub>2</sub>O<sub>4</sub> in 100 g MS (c), respectively.

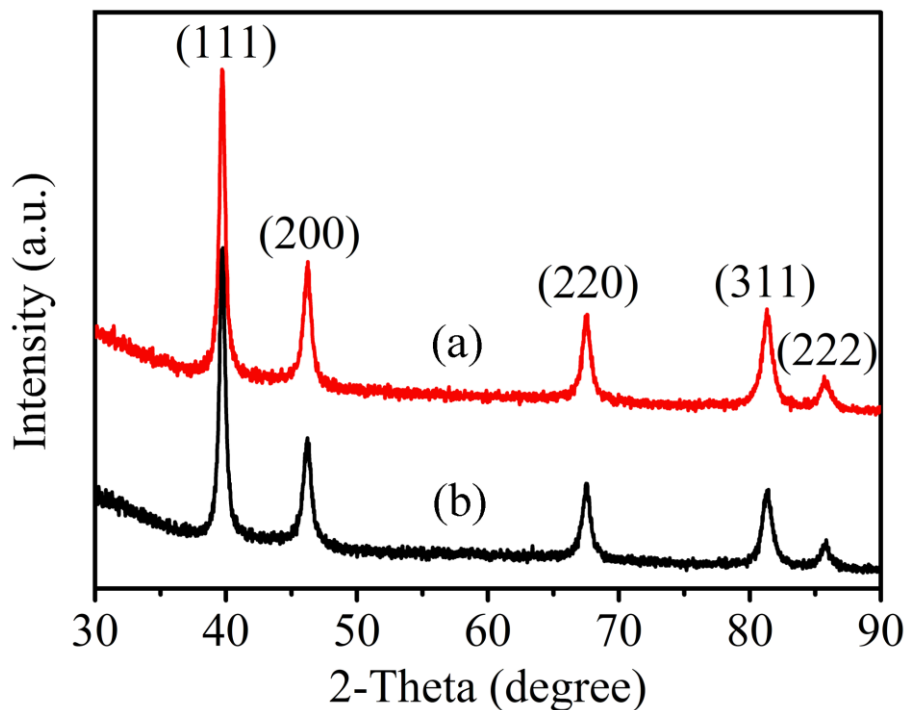

Fig. S4 The XRD patterns of the Pt concave NPs synthesized in freshly-made (a) and fourthly-recycled MSs (b) system.

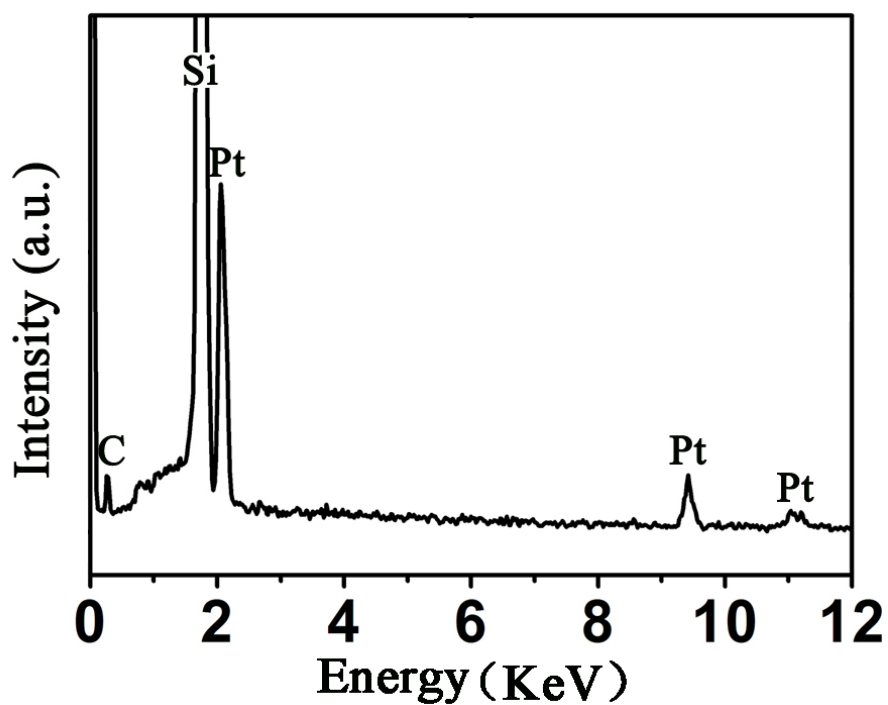

Fig. S5 The EDX spectrum of the Pt concave NPs synthesized in the fourthly-recycled MS.

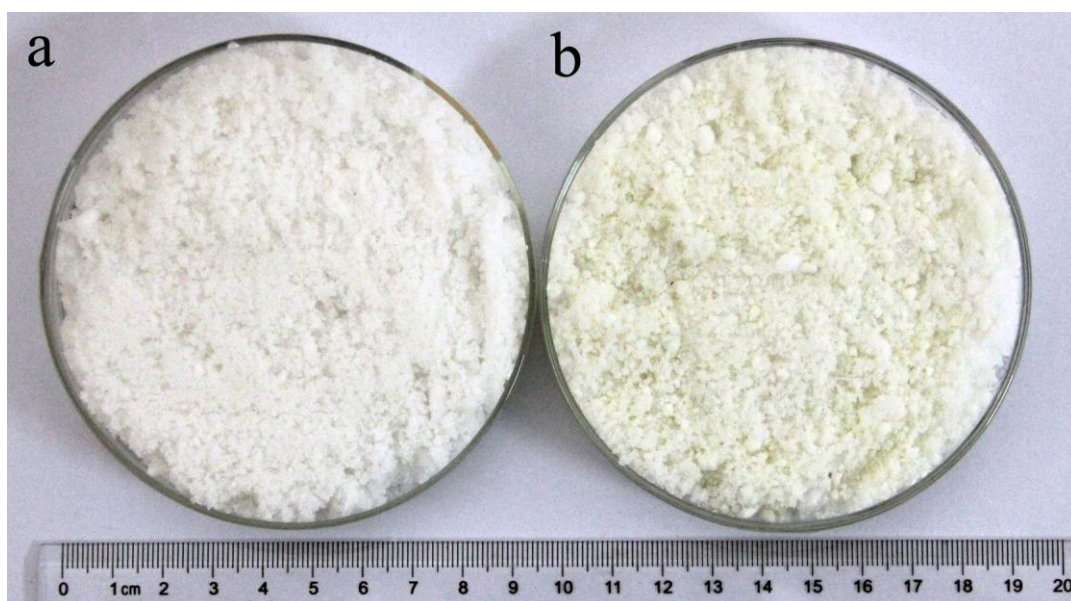

Fig. S6 Photograph of the freshly-made (a) and the fourthly-recycled (b) MSs.

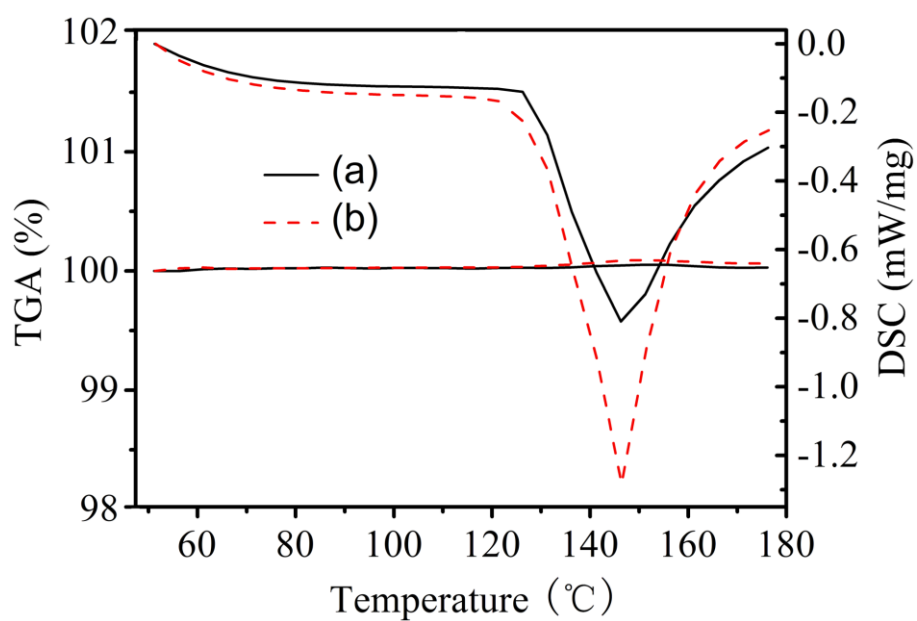

Fig. S7 The TGA and DSC patterns of the freshly-made (a) and fourthly-recycled MSs (b).

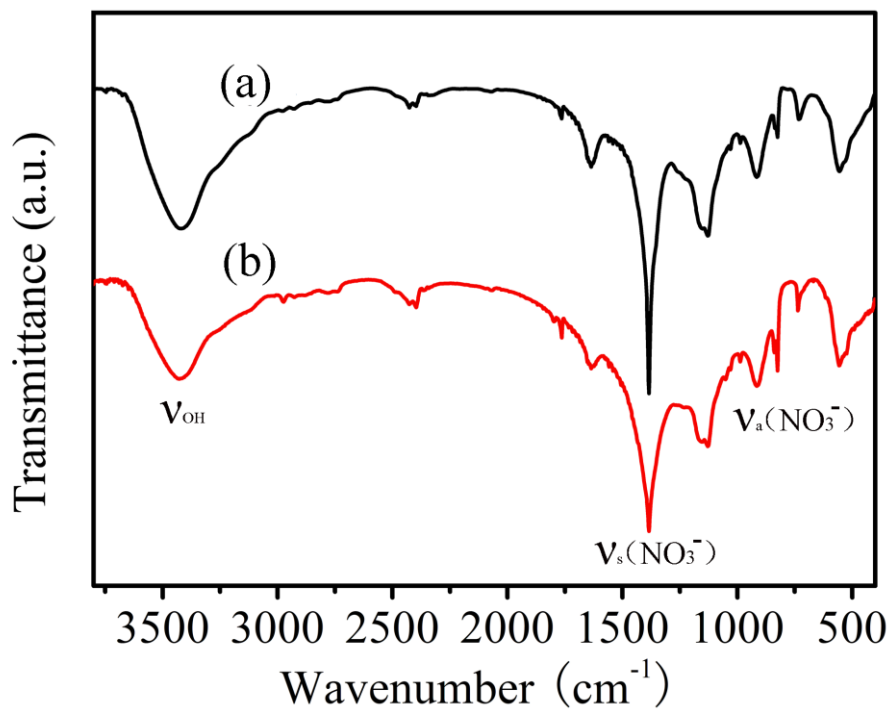

Fig. S8 The IR patterns of the freshly-made (a) and fourthly-recycled MSs (b).

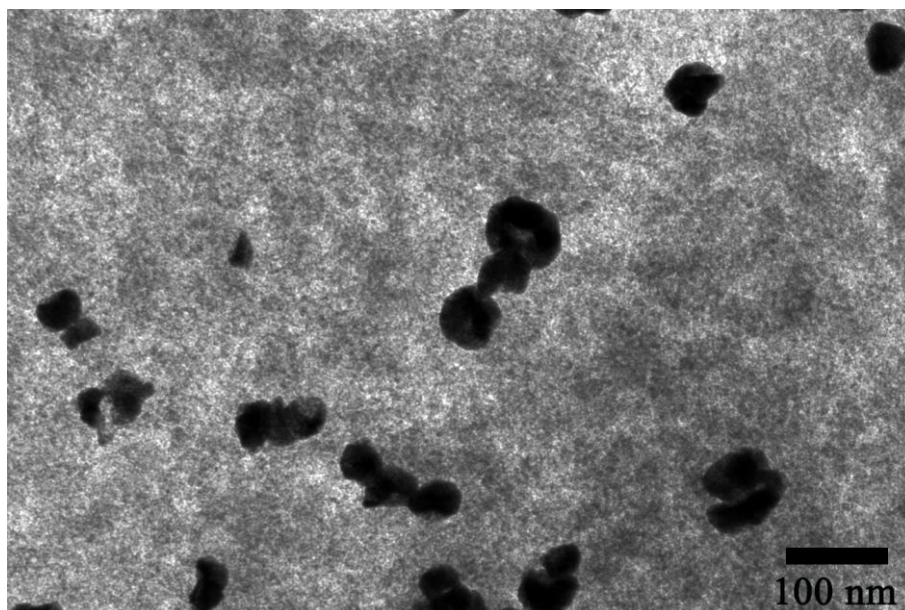

Fig. S9 TEM image of Pt concave NPs loaded on carbon black.

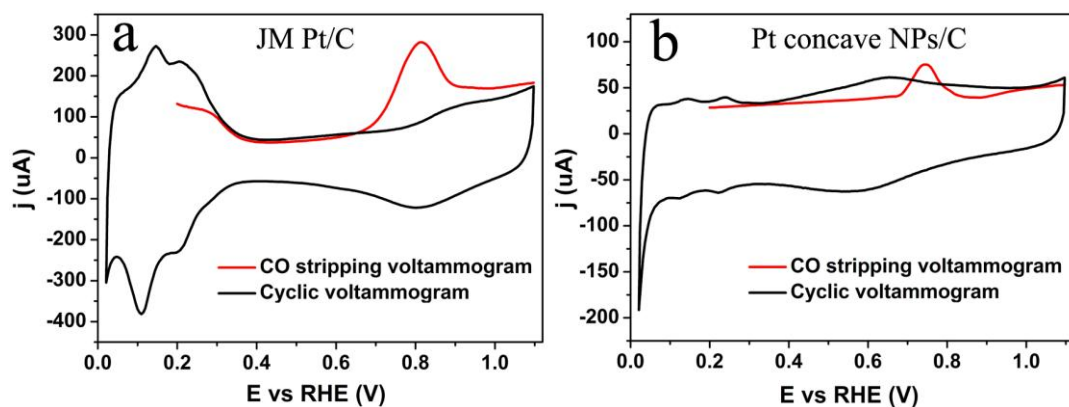

Fig. S10 Cyclic voltammograms (CVs) and CO stripping voltammograms of Pt/C (JM, 40 wt%) (a) and Pt concave NPs/C catalysts (b) in 0.1 M  $\text{HClO}_4$  at a scan rate of  $50 \text{ mVs}^{-1}$ . The CO adlayers were formed by exposing the Pt/C and Pt concave NPs/C electrode to CO-saturated 0.1 M  $\text{HClO}_4$  solution for 3 min at a potential of 0.1 V (vs. RHE). Then, the electrode was taken out and immediately immersed in the oxygen-free (purged with nitrogen for 30 min) 0.1 M  $\text{HClO}_4$  solution for measuring the CO stripping voltammograms. The CO stripping peak potentials were 0.74 V for Pt concave NPs/C and 0.81 V for Pt/C.

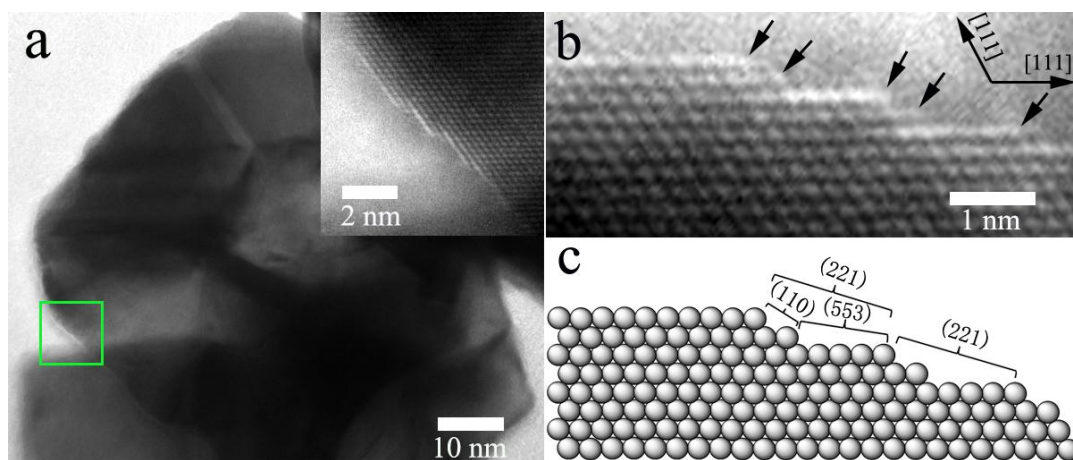

Fig. S11 (a) TEM image of the Pt concave NP, and the inset image of (a) was the HRTEM image of one surface facet that was marked in Fig. a by the square region, (b) enlarged HRTEM image of the surface facet that was shown in the inset image. The surface steps existed on the edge of the NPs, indicating the presence of high index facets. (c) Schematic of high-index planes observed on Pt concave NPs, and the step configurations of (110), (553), (221) and the real surfaces received from (b).

Table S1 List of the high index facets existed on the edge of the Pt concave that obtained from the method of microfacet notation, and these high index facets corresponding to those in Fig. S11.

| Number of atoms<br>across a terrace (n) | Step notation              | Microfacet notation                   | Surface facets (hkl) |
|-----------------------------------------|----------------------------|---------------------------------------|----------------------|
| n                                       | $(n+1) (111) \times (111)$ | $n_n (111) + 1_1 (11\bar{1})$         | $(n+1, n+1, n-1)$    |
| n=1                                     | $2 (111) \times (111)$     | $(1/2)_n (111) + (1/2)_1 (11\bar{1})$ | $(110)$              |
| n=4                                     | $5 (111) \times (111)$     | $4_4 (111) + 1_1 (11\bar{1})$         | $(553)$              |
